# Supplementary material for: [NiFe]-(Oxy)Sulfides Derived from NiFe2O4 for the Alkaline Hydrogen Evolution Reaction
Source: MDPI journal article supplement (doi:10.3390/en15020543), 2022-01-13
Supplement: s1 [file s1]

# Synthesis of [NiFe]-sulfides derived from $\text{NiFe}_2\text{O}_4$ as catalysts for the alkaline hydrogen evolution reaction

David Tetzlaff <sup>1,2</sup>, Vasanth Alagarasan <sup>2</sup>, Christopher Simon<sup>3</sup>, Daniel Siegmund<sup>1,2</sup>, Kai junge Puring<sup>1</sup>, Roland Marschall<sup>3</sup> and Ulf-Peter Apfel <sup>1,2,\*</sup>

<sup>1</sup> Fraunhofer Institute for Environmental, Safety, and Energy Technology UMSICHT, Osterfelder Straße 3, DE-46047 Oberhausen, Germany

<sup>2</sup> Ruhr University Bochum, Inorganic Chemistry I, Universitätsstraße 150, DE-44780 Bochum, Germany

<sup>3</sup> University of Bayreuth, Physical Chemistry III, Universitätsstrasse 30, 95447 Bayreuth, Germany

\* Correspondence: [ulf.apfel@rub.de](mailto:ulf.apfel@rub.de) and [ulf.apfel@umsicht.fraunhofer.de](mailto:ulf.apfel@umsicht.fraunhofer.de)

## Contents

|                                                                                                      |   |
|------------------------------------------------------------------------------------------------------|---|
| 1. Photoelectron spectroscopy (XPS) measurements of the synthesized <b>NFS</b> materials. ....       | 3 |
| 2. Scanning electron microscopy (SEM) images of the synthesized <b>NFS</b> materials. ....           | 4 |
| 3. Particle size analysis by laser diffraction of the synthesized <b>NFS</b> materials. ....         | 6 |
| 4. Electrochemical impedance spectroscopy measurements of the synthesized <b>NFS</b> materials. .... | 7 |
| 5. Electrochemical impedance spectroscopy measurements of the synthesized <b>NFS</b> materials. .... | 8 |
| 6. Tafel analysis .....                                                                              | 9 |

1. Photoelectron spectroscopy (XPS) measurements of the synthesized **NFS** materials.

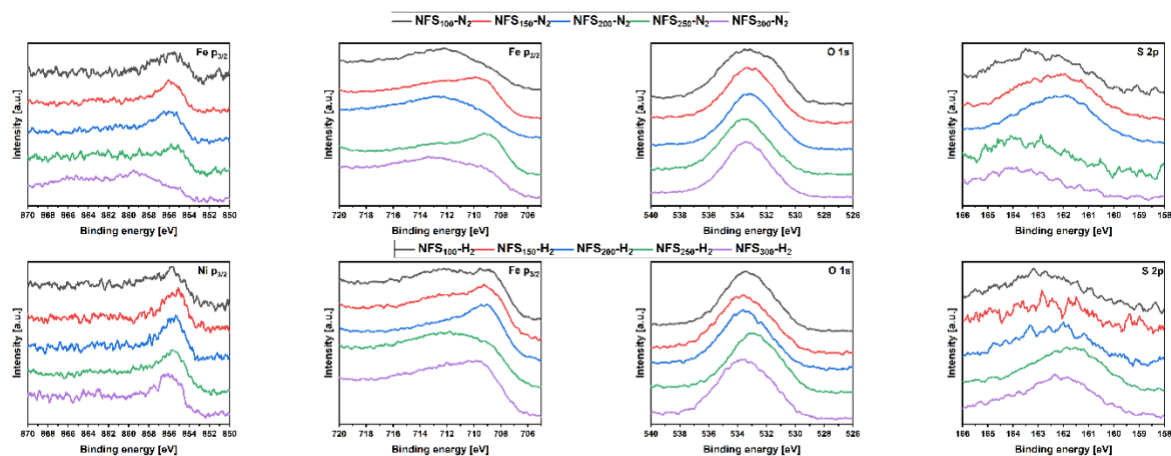

**Figure S1:** XPS spectra of the **NFS-N<sub>2</sub>** and **NFS-H<sub>2</sub>** materials

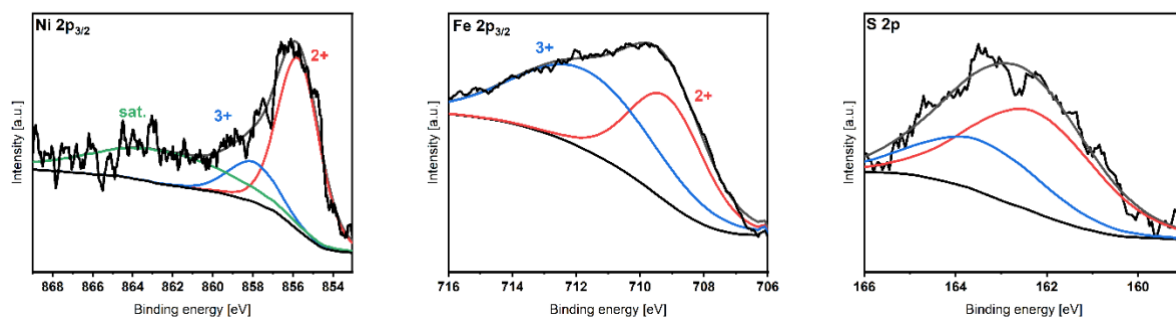

**Figure S2:** Deconvoluted XPS spectra of **NFS<sub>300</sub>-H<sub>2</sub>**.

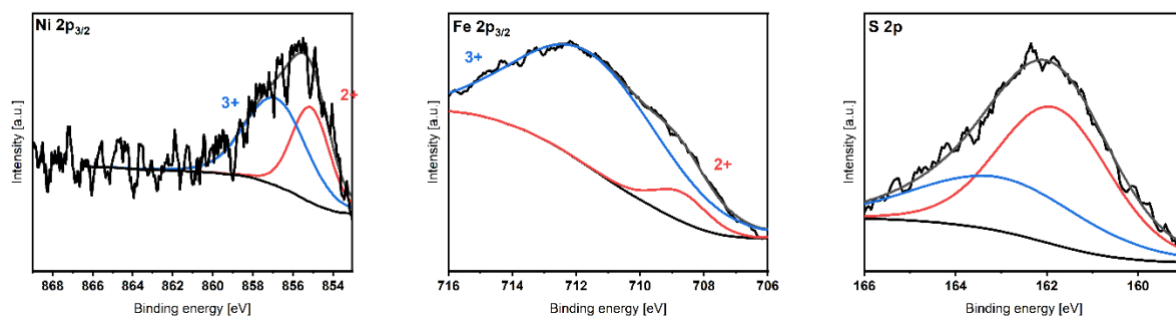

**Figure S3:** Deconvoluted XPS spectra of **NFS<sub>100</sub>-N<sub>2</sub>**.

2. Scanning electron microscopy (SEM) images of the synthesized **NFS** materials.

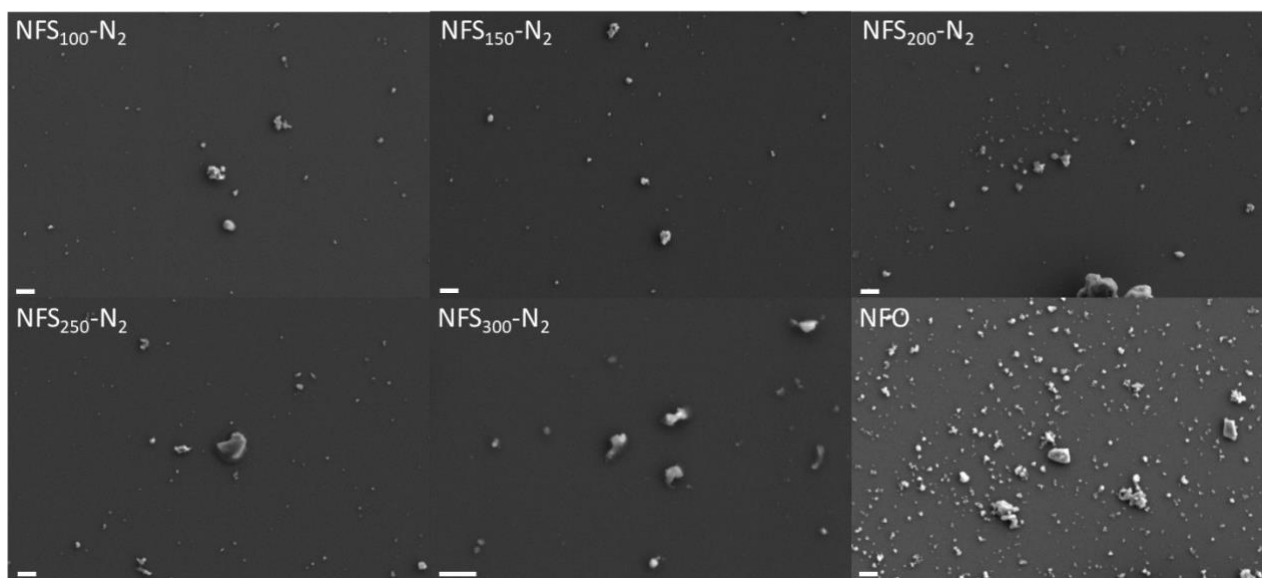

**Figure S4:** SEM images of the synthesized **NFS-N<sub>2</sub>** electrocatalyst materials in comparison to **NFO**. The scale bar is 1  $\mu\text{m}$ .

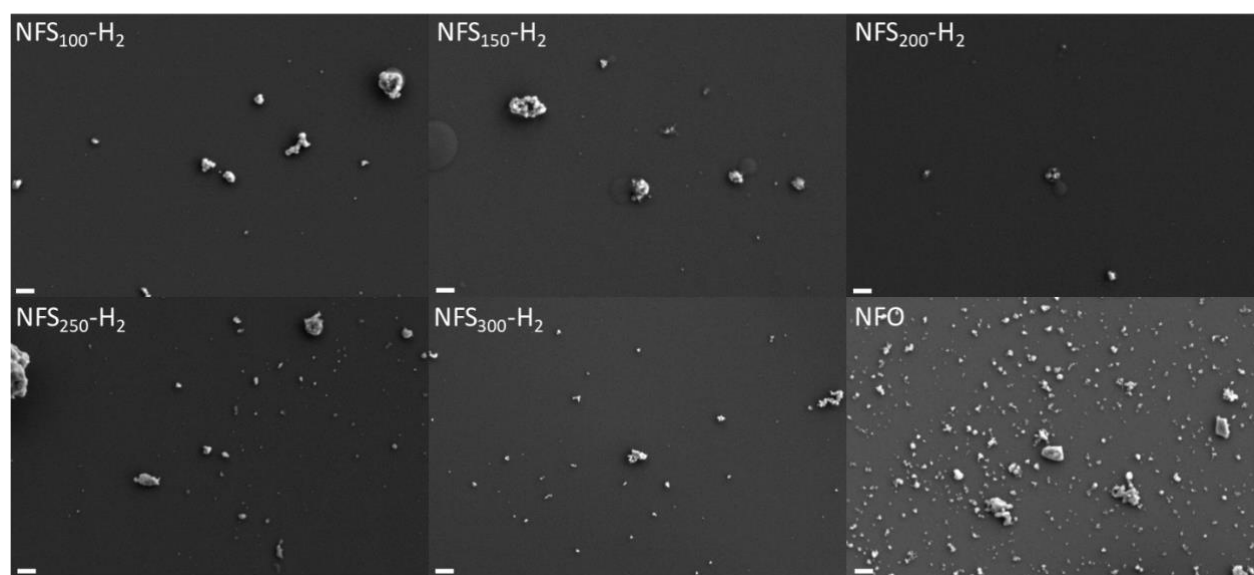

**Figure S5:** SEM images of the synthesized **NFS-H<sub>2</sub>** electrocatalyst materials in comparison to **NFO**. The scale bar is 1  $\mu\text{m}$ .

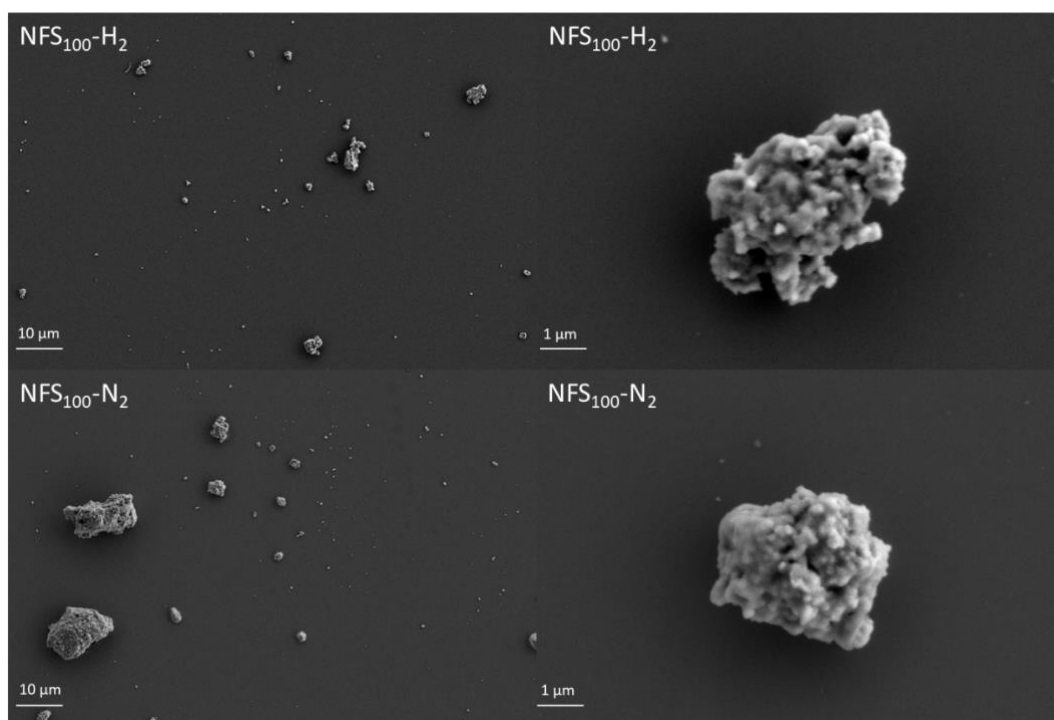

**Figure S6:** SEM images of the synthesized  $\text{NFS}_{100}\text{-H}_2$  and  $\text{NFS}_{100}\text{-N}_2$  electrocatalyst materials indicating particle agglomeration.

3. Particle size analysis by laser diffraction of the synthesized **NFS** materials.

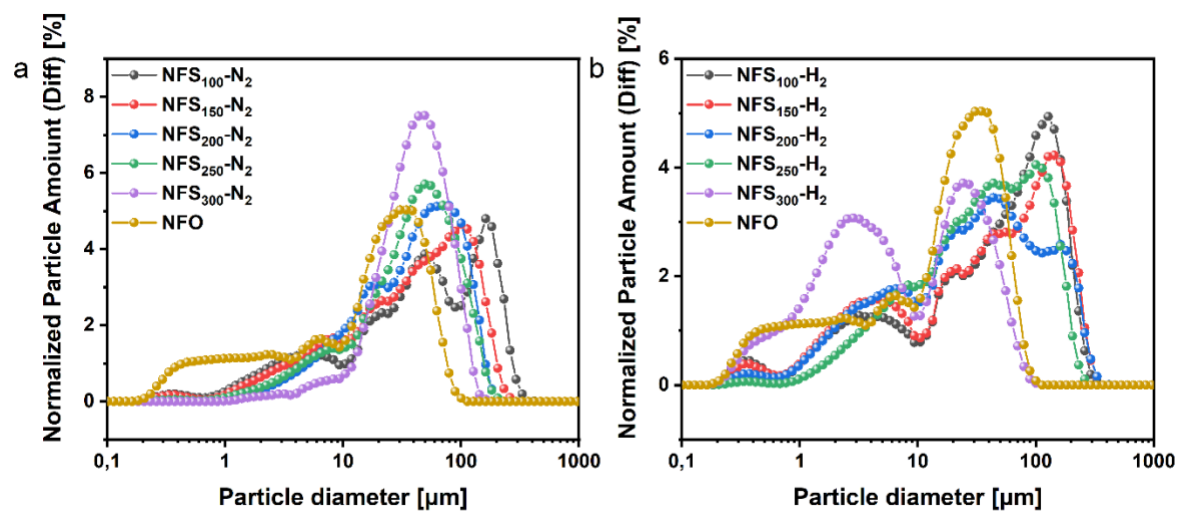

**Figure S7:** Particle size analysis of the synthesized **NFS** electrocatalysts by laser diffraction.

4. Electrochemical impedance spectroscopy measurements of the synthesized **NFS** materials.

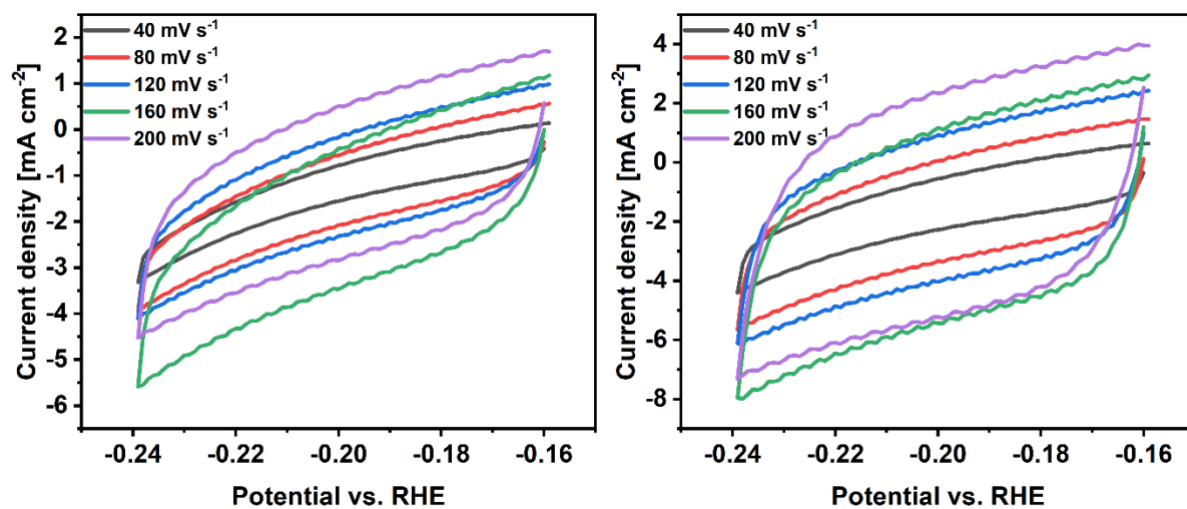

**Figure S8:** Cyclic voltammetry measurements for the determination of the double layer capacity ( $C_{\text{DL}}$ ). Left: **NFS- $\text{N}_2$** . Right: **NFS- $\text{H}_2$**

- Electrochemical impedance spectroscopy measurements of the synthesized **NFS** materials.

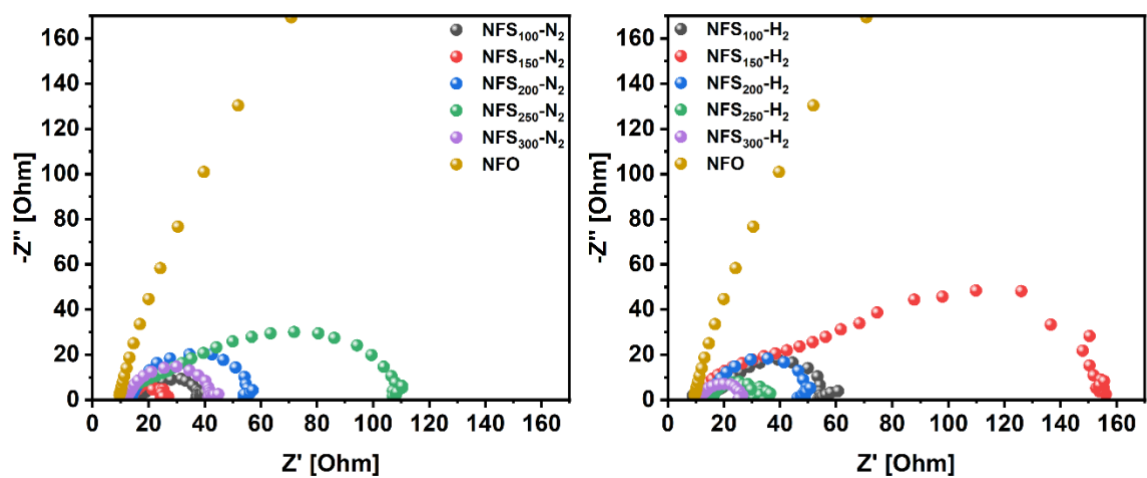

**Figure S9:** Electrochemical impedance spectroscopy (EIS) measurements performed at -0.4 V vs. RHE from 100 kHz to 0.10 Hz of the synthesized **NFS- $N_2$**  and **NFS- $H_2$**  electrocatalysts.



## 6. Tafel analysis

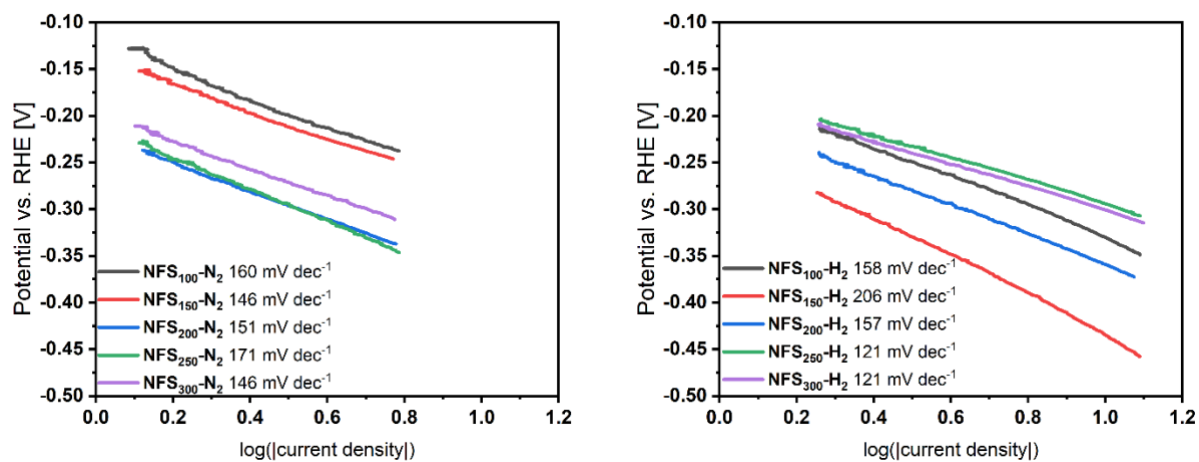

**Figure S10:** Tafel analysis of the synthesized **NFS** materials.
